# Supplementary material for: Brain-to-Brain Synchrony during Naturalistic Social Interactions
Source: PubMed Central journal article supplement (PMC5719019; doi:10.1038/s41598-017-17339-5), 2017-12-06
Supplement: 41598_2017_17339_MOESM1_ESM.pdf [file 41598_2017_17339_MOESM1_ESM.pdf]

## Brain-to-Brain Synchrony during Naturalistic Social Interactions

Sivan Kinreich<sup>1</sup>

Amir Djalovski<sup>2</sup>

Lior Kraus<sup>1</sup>

Yoram Louzoun<sup>1,3</sup>

Ruth Feldman<sup>4,5</sup>

<sup>1</sup>Gonda Brain Sciences Center, Bar-Ilan University

<sup>2</sup>Department of Psychology, Bar-Ilan University

<sup>3</sup>Department of Mathematics, Bar-Ilan University

<sup>4</sup>Baruch Ivcher School of Psychology, Interdisciplinary Center, Herzlia

<sup>5</sup>Yale University Child Study Center

For Correspondence

Ruth Feldman, PhD

Simms-Mann Professor of Developmental Social Neuroscience

Baruch Ivcher School of Psychology,

Interdisciplinary Center (IDC) Herzliya,

P.O. Box 167, Herzliya 46150, Israel, Phone: 972-544566353

email: [feldman.ruth@gmail.com](mailto:feldman.ruth@gmail.com)

Running Title; Brain-to-Brain Synchrony

Supplementary Table 1: Summary of trials and electrodes included in the analysis (%)

|              | Strangers<br>%Mean<br>(SD) | Couples<br>%Mean<br>(SD) | t-test      |
|--------------|----------------------------|--------------------------|-------------|
| # Trials     | 70.12<br>(15.48)           | 73.67<br>(13.2)          | $p < 0.34$  |
| # Electrodes | 73.14<br>(5.02)            | 71.92<br>(4.66)          | $p < 0.792$ |

Supplementary Table 2. Percentages of Dyadic behaviors in Males and Females  
Couples and Strangers

| Groups    | Behavior        | Both<br>% Mean (SE)<br>[N] | Female<br>% Mean (SE)<br>[N] | Male<br>% Mean (SE)<br>[N] | Neutral<br>% Mean (SE)<br>[N] |
|-----------|-----------------|----------------------------|------------------------------|----------------------------|-------------------------------|
| Couples   | Positive Affect | 26.73 (3.97)<br>[21]       | 18.5 (2.93)<br>[21]          | 11.12 (2.42)<br>[21]       | 41.42 (8.76)<br>[19]          |
|           | Gaze            | 52.81 (2.91)<br>[24]       | 20.59 (1.71)<br>[24]         | 20.07 (1.61)<br>[24]       | 6.51 (2.96)<br>[6]            |
| Strangers | Positive Affect | 23.79 (3.26)<br>[23]       | 16.04 (4.11)<br>[23]         | 15.16 (1.98)<br>[23]       | 42.68 (5.92)<br>[20]          |
|           | Gaze            | 28.65 (1.59)<br>[25]       | 23.08 (1.6)<br>[25]          | 26.93(1.79)<br>[25]        | 21.33 (6.31)<br>[11]          |

Supplementary Table 3: Correlations between Gamma Synchrony and the Dyads' Subjective Experience

| Subjective Assessment                             | Men<br>stranger     | Women<br>stranger    | Men<br>couple        | Women<br>couple    |
|---------------------------------------------------|---------------------|----------------------|----------------------|--------------------|
| 1. Collaboration between the dyad                 | R=0.43<br>P= 0.03 * | R=0.47<br>P= 0.01 *  | R=0.24<br>P= 0.26    | R=-0.04<br>P= 0.83 |
| 2. How pleasant was the interaction               | R=0.36<br>P= 0.07   | R=0.07<br>P=0.74     | R=0.43<br>P= 0.04 *  | R=0.17<br>P= 0.41  |
| 3. Contribution of the partner to the interaction | R=0.30<br>P= 0.15   | R=0.15<br>P= 0.46    | R=0.58<br>P= 0.00 ** | R=-0.12<br>P= 0.57 |
| 4. Contribution of yourself to the interaction    | R=0.28<br>P= 0.17   | R=0.53<br>P= 0.00 ** | R=0.14<br>P= 0.51    | R=0.16<br>P= 0.46  |

R – Spearman correlation

\* p<0.05

\*\* p<0.01

## **Power Calculations**

FDR correction was applied to the resulting correlation p values of (n= 8; groups and brain lobes \* frequencies bins) comparisons and tested at 0.05 level <sup>75</sup>, and Cohen's effect size <sup>76</sup> was calculated over all the correlation results. The cortical sources of the couples EEG rhythms within a given frequency range<sup>39</sup> were estimated by low-resolution brain electromagnetic tomography (LORETA)<sup>77-79</sup>,
